# Supplementary material for: Size- and morphology-controllable synthesis of MIL-96 (Al) by hydrolysis and coordination modulation of dual aluminium source and ligand systems
Source: Royal Society of Chemistry journal article supplement (doi:10.1039/c5dt02379c), 2015-01-01
Supplement: c5dt02379c1.pdf [file c5dt02379c1.pdf]

## Supporting Information for

**Size- and morphology-controlled MIL-96 (Al) fabricated by hydrolysis and  
coordination modulation of dual aluminium source and ligand**

Dandan Liu, Yunqi Liu,\* Fangna Dai, Jinchong Zhao, Kang Yang,

Chenguang Liu\*

State Key Laboratory of Heavy Oil Processing, Key Laboratory of Catalysis, China

National Petroleum Corp. (CNPC), China University of Petroleum (East China),

Qingdao, P. R. China

E-mail: liuyq@upc.edu.cn (Y. Liu), cgliu@upc.edu.cn (C. Liu)

Fig. S1

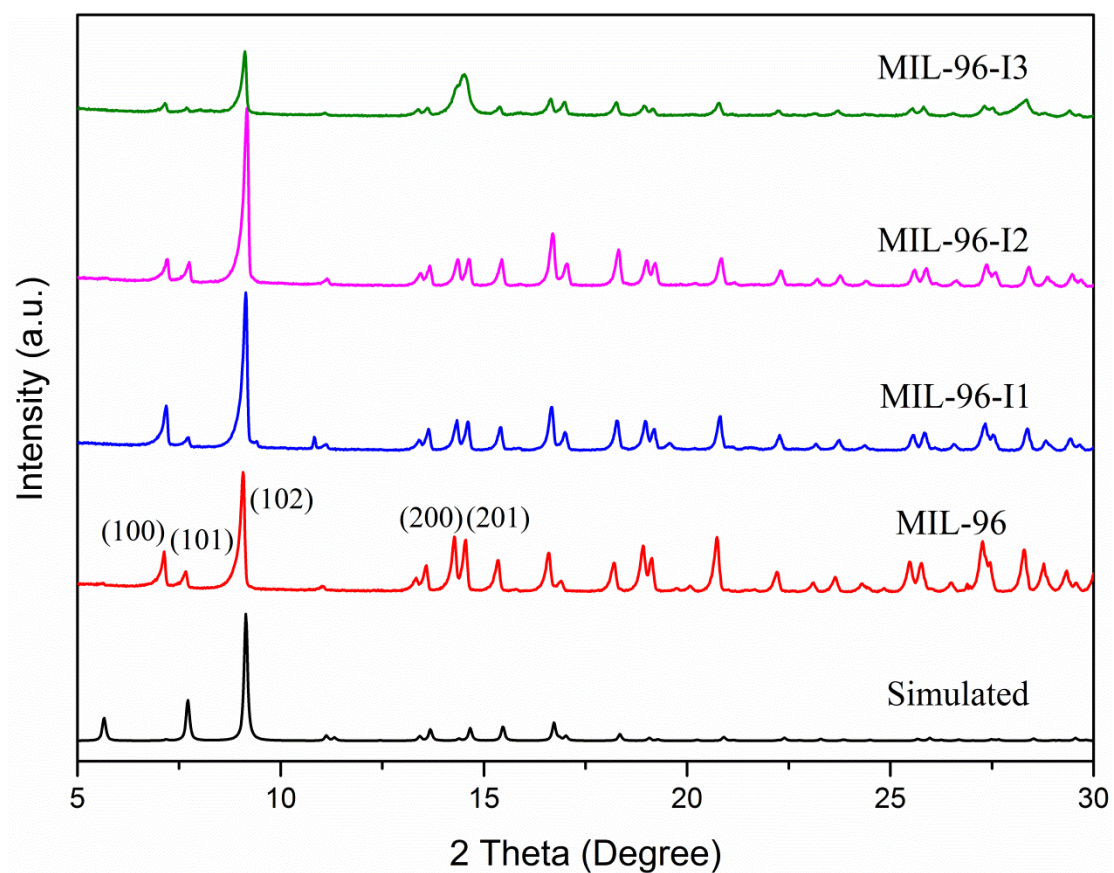

**Fig. S1** XRD patterns of the simulated MIL-96 pattern and as-synthesized MIL-96 crystals with different weight ratios of isopropanol in conventional synthesis method of MIL-96 (0 %- 11.4 %).

Fig. S2

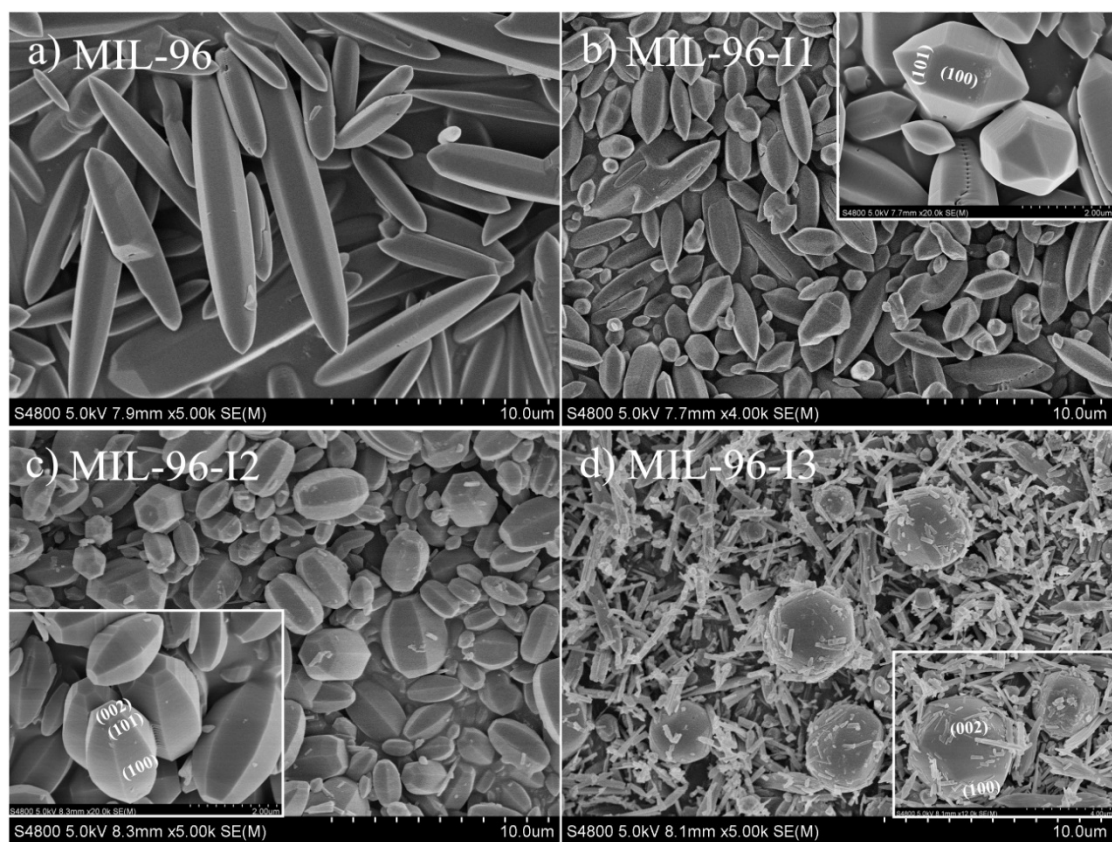

**Fig. S2** SEM images of the MIL-96 crystals with the addition of different weight ratios of isopropanol a) 0 %, b) 2 %, c) 6.8 %, d) 11.4 %, inset is the corresponding magnified SEM images.

Fig. S3

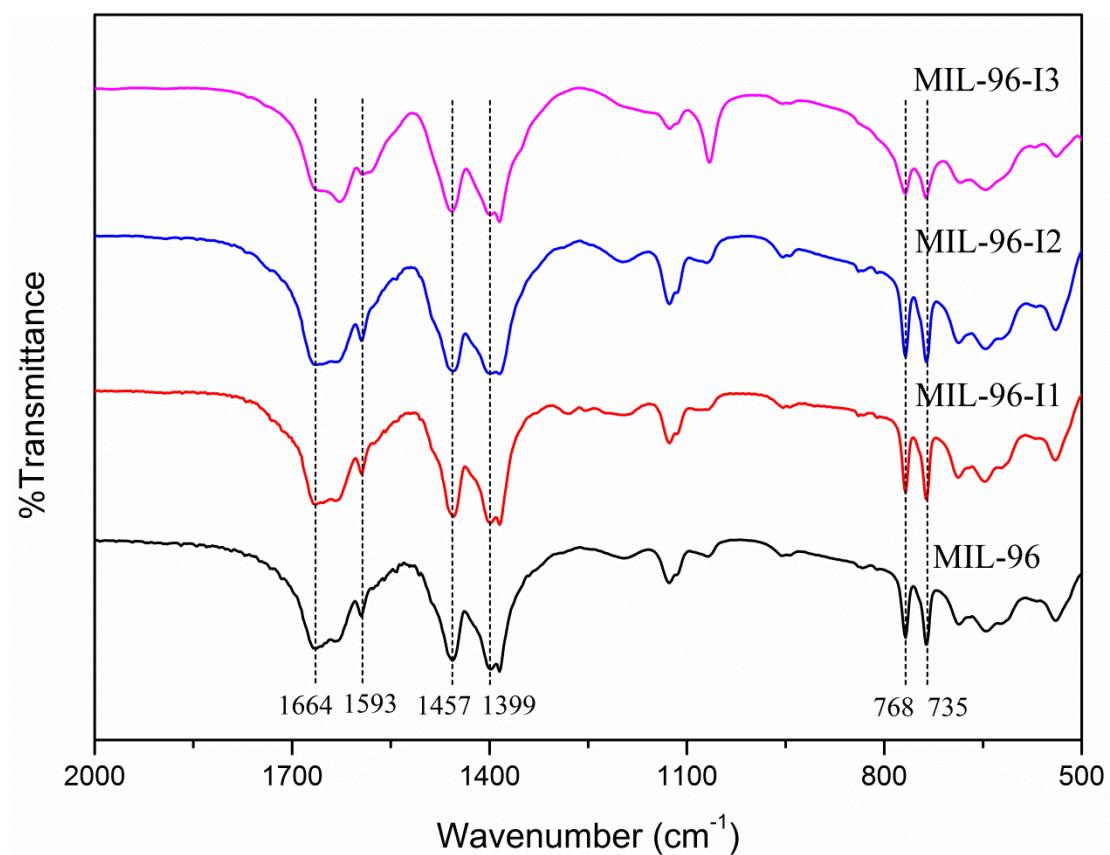

**Fig. S3** IR spectra of the MIL-96 crystals with the addition of different weight ratios of isopropanol (0 %- 11.4 %).

Fig. S4

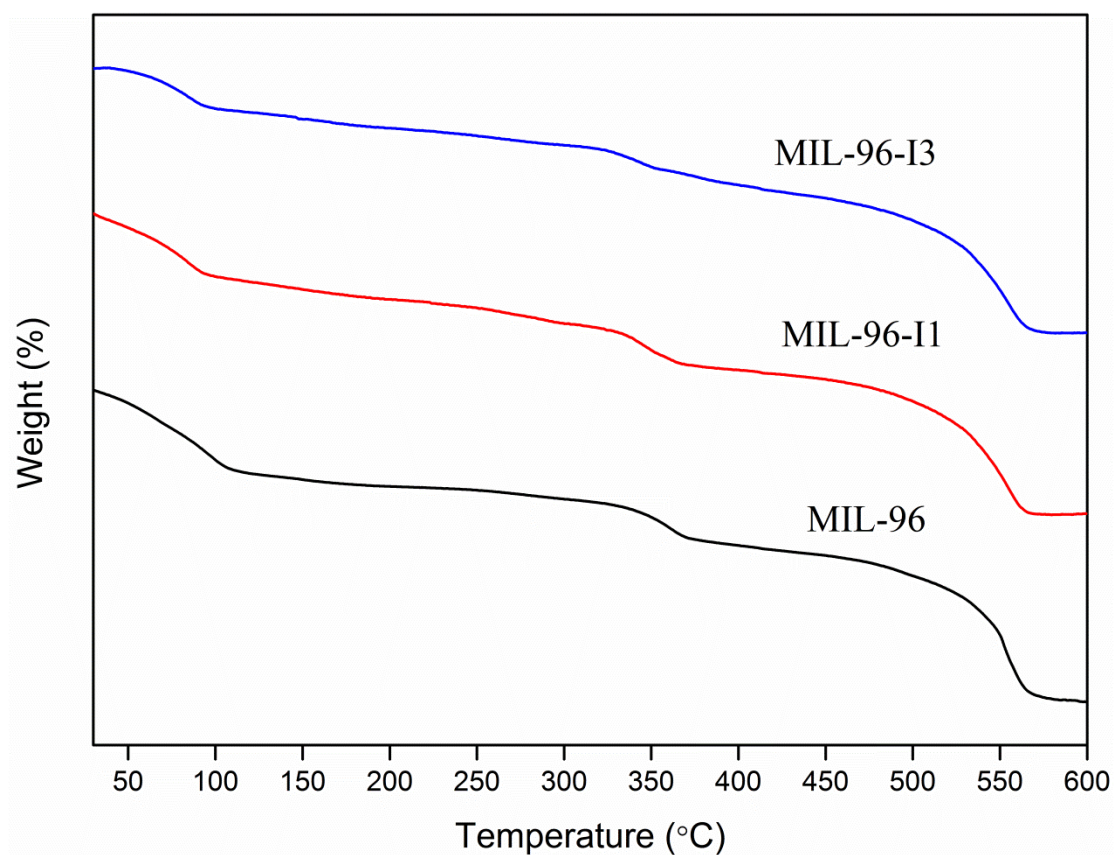

Fig. S4 TGA curves of the MIL-96 crystals with the addition of different weight ratios of isopropanol (0 %, 2 %, 11.4 %)
